# Supplementary material for: Flexible hybrid photodetector based on silver sulfide nanoparticles and multi-walled carbon nanotubes
Source: Royal Society of Chemistry journal article supplement (doi:10.1039/d1ra03385a), 2021-01-01
Supplement: d1ra03385a1.pdf [file d1ra03385a1.pdf]

## Supporting Information

# Flexible Hybrid Photodetector Based on Silver Sulfide Nanoparticles and Multi-walled Carbon Nanotubes

Sung Ho Kim,<sup>a</sup> Jieun Lim,<sup>a,b</sup> Seonjeong Lee,<sup>a</sup> Myung Hyun Kang,<sup>a</sup> Wooseok Song,<sup>a</sup> Jongsun Lim,<sup>a</sup> Sunsuk Lee,<sup>a</sup> Eun Kyoung Kim,<sup>b</sup> Joung Kyu Park,<sup>a,\*</sup> Sung Myung<sup>a,\*</sup>

<sup>a</sup>Advanced Materials Division, Korea Research Institute of Chemical Technology, Daejeon 34114, Korea

<sup>b</sup>Department of Chemical and Biomolecular Engineering, Yonsei University, Seoul 03722, Korea

\*Corresponding authors.

*E-mail addresses:* parkjk@kRICT.re.kr (J. K. Park) and msung@kRICT.re.kr (S. Myung)

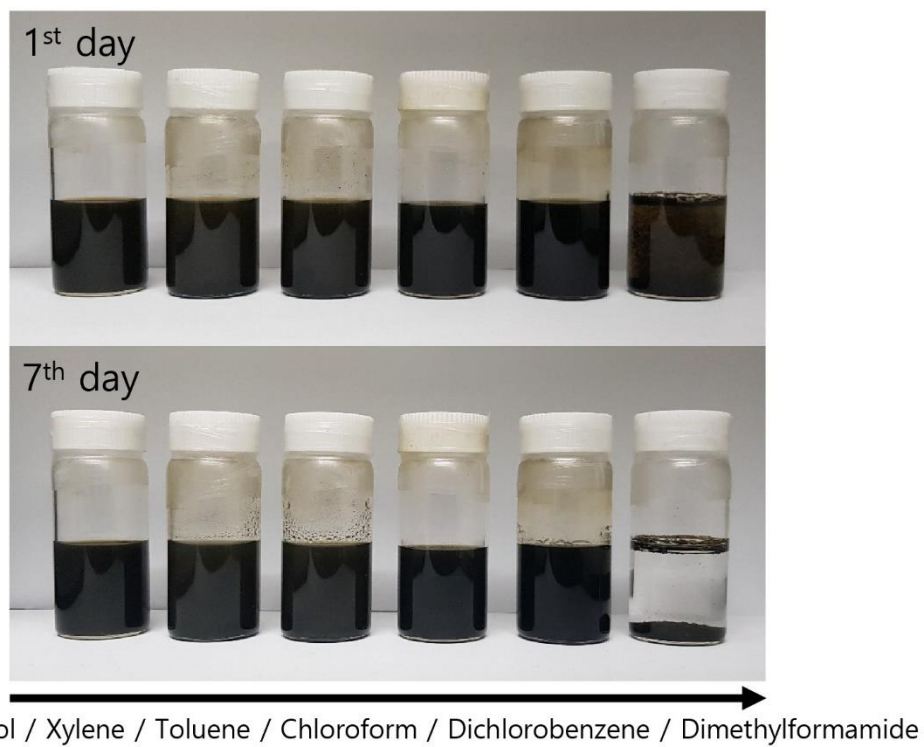

**Figure S1.** Solution dispersion test in different solvents.

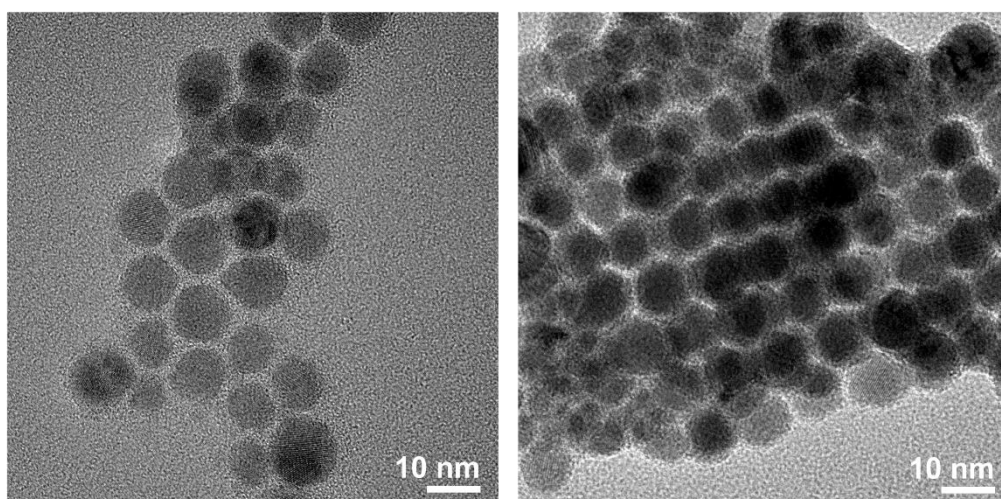

**Figure S2.** TEM Images of bare Ag<sub>2</sub>S NPs.

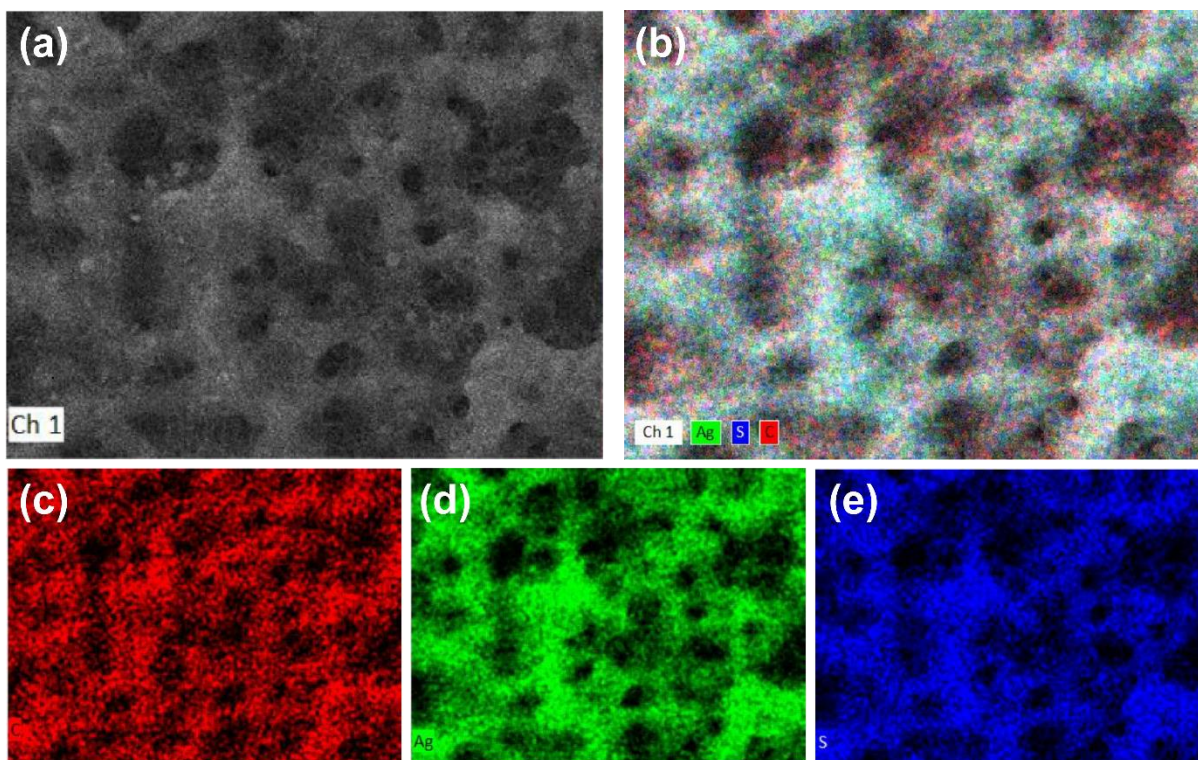

**Figure S3.** (a) EDS mapping SEM image of the CNT-ANs film. (b) EDS layered image, and element mapping image as (c) Carbon, (d) Silver, (e) Sulfur.

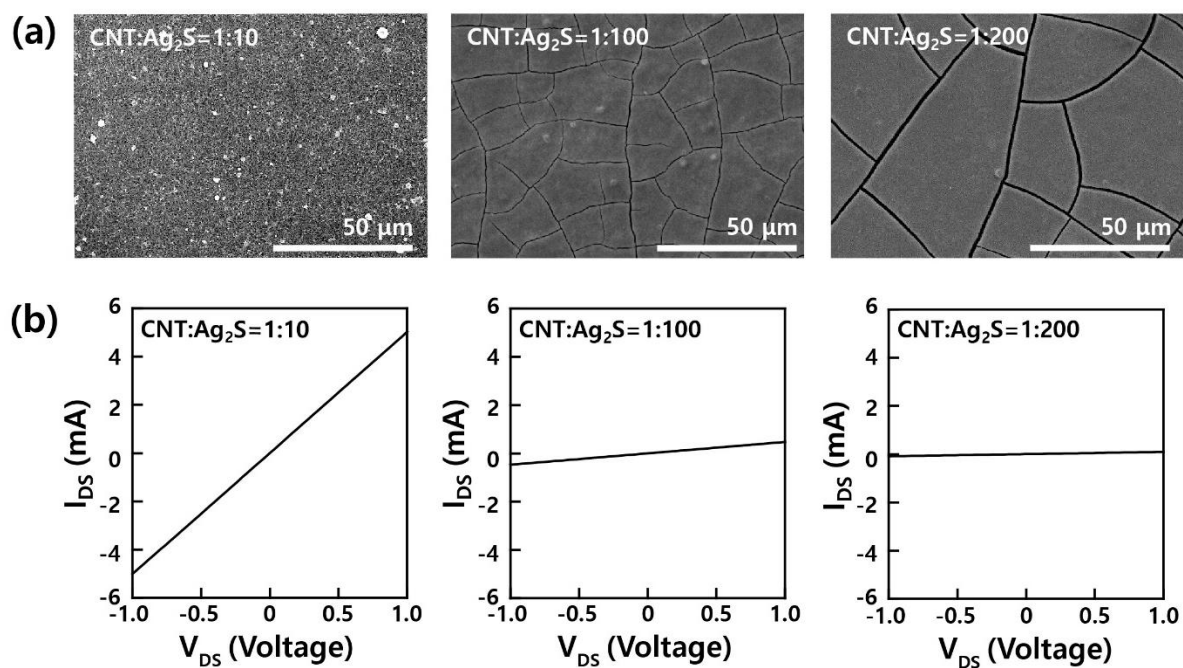

**Figure S4.** Crack effect in the CNT-AN films. (a) SEM image of CNT-AN samples (1:10, 1:100, 1:200 (CNT:Ag<sub>2</sub>S)). Scale bar: 50  $\mu$ m. (b) I-V curve of CNT-ANs photodetector devices.

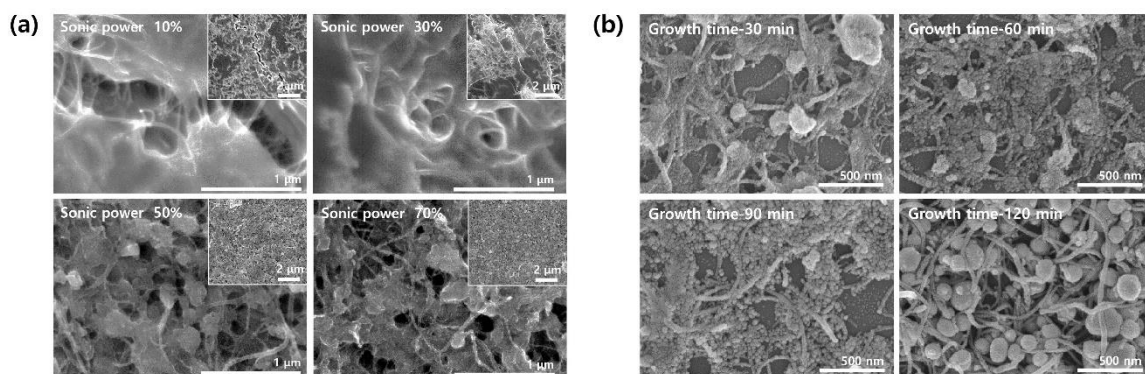

**Figure S5.** (a) CNT-Ag<sub>2</sub>S 1:10 surface morphology according to synthesis power. Scale bar: 1 μm. Inset scale bar: 2 μm. (b) CNT-Ag<sub>2</sub>S 1:10 surface morphology according to synthesis time. Scale bar: 500 nm. Inset scale bar: 500 nm.

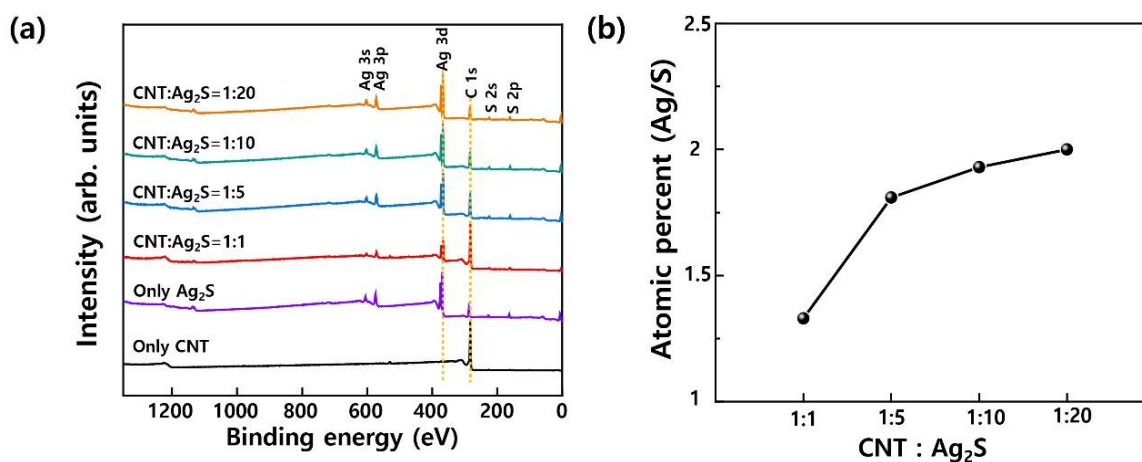

**Figure S6.** (a) XPS profiles of CNT-ANs, Ag<sub>2</sub>S, CNT. (b) Atomic percent (Ag/S) of CNT-ANs mixture.

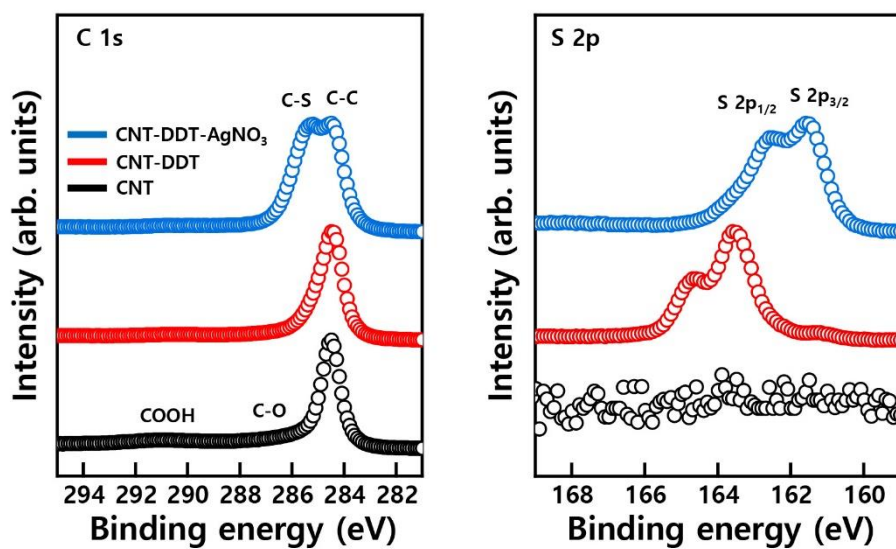

**Figure S7.** XPS C 1s and S 2p profiles of CNT, CNT-DDT, and CNT-DDT-AgNO<sub>3</sub>.

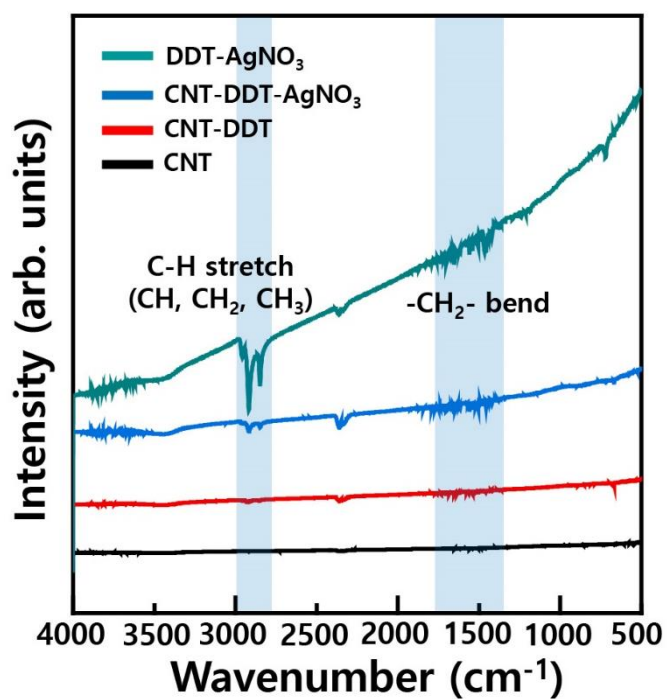

**Figure S8.** FTIR spectra of CNT, CNT-DDT, and CNT-DDT-AgNO<sub>3</sub>.

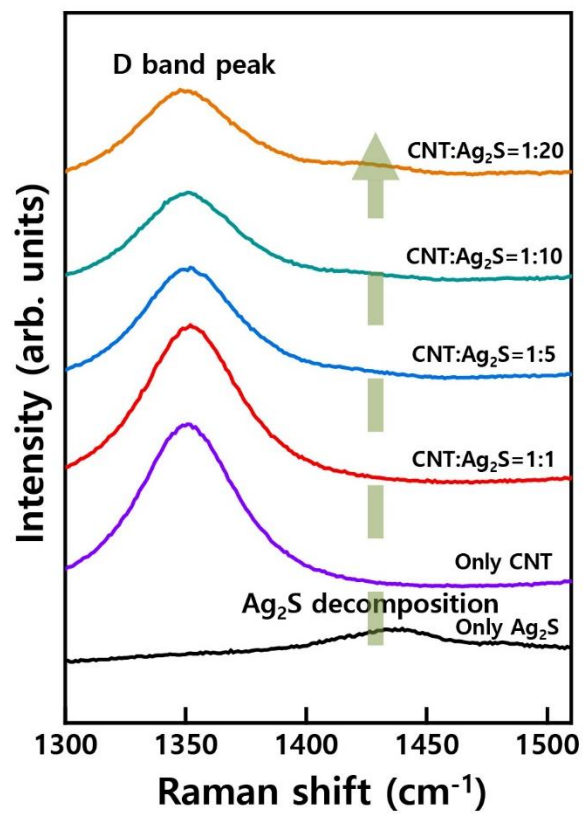

**Figure S9.** Raman spectra of decomposition of Ag<sub>2</sub>S NPs.

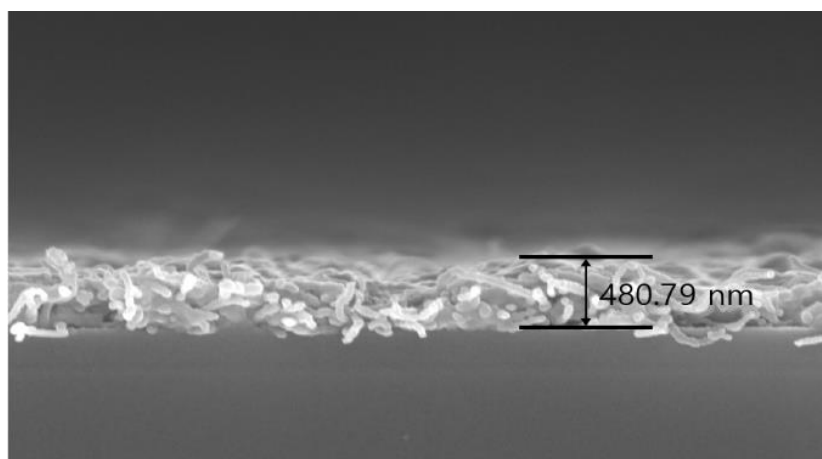

**Figure S10.** Cross-sectional SEM image of CNT-ANs film.

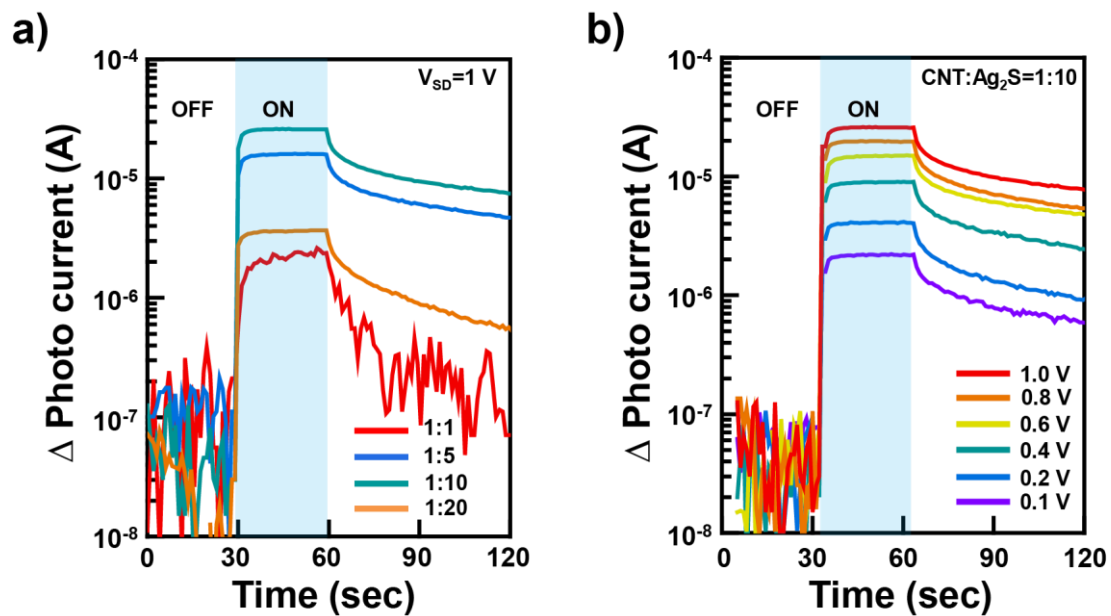

**Figure S11.** Log scale photocurrent of CNT-ANs photodetectors according to voltage.

**Table S1.** Time response by repeat cycle light exposure of CNT-ANs at white light, and at 800, 550, and 350 nm.

|                   | White light | 800 nm | 550 nm | 350 nm |
|-------------------|-------------|--------|--------|--------|
| Response time (s) | 1.18        | 2.18   | 1.60   | 3.69   |
| Decay time (s)    | 15.16       | 18.79  | 17.90  | 20.55  |
